# Supplementary material for: The Grapevine Calmodulin-Like Protein Gene CML21 Is Regulated by Alternative Splicing and Involved in Abiotic Stress Response
Source: PubMed Central journal article supplement (PMC7663043; doi:10.3390/ijms21217939), 2020-10-26
Supplement: ijms-21-07939-s001.pdf [file ijms-21-07939-s001.pdf]

**Table. S1** The nucleotide sequences of *CML21* splice variants of *Vitis vinifera* and *Vitis amurensis*.

**>VviCML21v1(VIT\_219s0015g01200.1)**

ATGGGAGGCGTGGTGGGAAAAGGCGATTACCTAGAAAAGCCTGGGTACCAGAAACAAAGCTTGAGGCCA  
AAATGGTTGAAGCTATGCAGCGGAGGGCATCTGAAGGAAGCACCATGAAATCGTTCAACAGTATAATCTTG  
AAGTTCCCAAAAATTGATGAGAGTTAAGGAACTGCAAAGCTATTTTTAGCAATTTGATGAGGATTCAAAT  
GGTGAATAGATCATGAAGAACTGAAAAGATGTTTCCTTAACTGGAGATTTCTTTTTAGAGGAGGAAATC  
AACGATCTTTTTGAGGCATGTGATATCAATGAGGATATGGGAATGAAGTTCAATGAGTTCATTGTACTTCTCT  
GCCTTGTCTATCTTCTCAAGGAGGATCCTGCTGCCCTTCAGGCCGATCCAAAAAATCACGGATGGGGATGC  
CAAATCTGGAGGCAACCTTTGAAACACTGGTTGATGCATTTGTGTTCTGGACAAGAATAAGGATGGTTATG  
TGAGCAAGAGCGAGATGGTGCATGCAATAAATGAAACAACCTGCAGGGGAGCGTTCTTCTGGAAGAATAGCC  
ATGAAAAGATTGAGGAGATGGATTGGGATAAAAATGGAATGGTGAACCTCAAGGAGTTTCTTTTTGCTTTC  
ACCCGTTGGGTTGGGATTGACGATATTGAGGATGAAGAAGAAGAAGGTGAAGAGAAAGTTTGA

**>VviCML21v2(VIT\_219s0015g01200.2)**

ATGGGAGGCGTGGTGGGAAAAGGCGATTACCTAGAAAAGCCTGGGTACCAGAAACAAAGCTTGAGGCCA  
AAATGGTTGAAGCTATGCAGCGGAGGGCATCTGAAGGAAGCACCATGAAATCGTTCAACAGTATAATCTTG  
AAGTTCCCAAAAATTGATGAGAGTTAAGGAACTGCAAAGCTATTTTTAGCAATTTGATGAGGATTCAAAT  
GGTGAATAGATCATGAAGAACTGAAAAGATGTTTCCTTAACTGGAGATTTCTTTTTAGAGGAGGAAATC  
AACGATCTTTTTGAGGCATGTGATATCAATGAGGATATGGGAATGAAGTTCAATGAGTTCATTGTACTTCTCT  
GCCTTGTCTATCTTCTCAAGGAGGATCCTGCTGCCCTTCAGGCCAAATCACGGATGGGGATGCCAAATCTGG  
AGGCAACCTTTGAAACACTGGTTGATGCATTTGTGTTCTGGACAAGAATAAGGATGGTTATGTGAGCAAGA  
GCGAGATGGTGCATGCAATAAATGAAACAACCTGCAGGGGAGCGTTCTTCTGGAAGAATAGCCATGAAAAG  
ATTGAGGAGATGGATTGGGATAAAAATGGAATGGTGAACCTCAAGGAGTTTCTTTTTGCTTTCACCCGTTGG  
GTTGGGATTGACGATATTGAGGATGAAGAAGAAGAAGGTGAAGAGAAAGTTTGA

**>VviCML21v3(VIT\_219s0015g01200.7)**

ATGCTGTGTATCATCCTTCATGTTGTATTTGCTTCTTCCCTCTCTGACATGCCGGTGGTTGAAATTCATTGTTTT  
TTCTTCATAGATGAGGATTCAAATGGTGCAATAGATCATGAAGAACTGAAAAGATGTTTCCTTAACTGGAG  
ATTTCTTTTTAGAGGAGGAAATCAACGATCTTTTTGAGGCATGTGATATCAATGAGGATATGGGAATGAAG  
TTCAATGAGTTCATTGTACTTCTCTGCCTTGTCTATCTTCTCAAGGAGGATCCTGCTGCCCTTCAGGCCGATC  
CAAAAAATCACGGATGGGGATGCCAAATCTGGAGGCAACCTTTGAAACACTGGTTGATGCATTTGTGTTCT  
GGACAAGAATAAGGATGGTTATGTGAGCAAGAGCGAGATGGTGCATGCAATAAATGAAACAACCTGCAGGG  
GAGCGTTCTTCTGGAAGAATAGCCATGAAAAGATTGAGGAGATGGATTGGGATAAAAATGGAATGGTGAA  
CTTCAAGGAGTTTCTTTTTGCTTTCACCCGTTGGGTTGGGATTGACGATATTGAGGATGAAGAAGAAGAAGGT  
GAAGAGAAAGTTTGA

**>VviCML21v4(VIT\_219s0015g01200.8)**

ATGCTGTGTATCATCCTTCATGTTGTATTTGCTTCTTCCCTCTCTGACATGCCGGTGGTTGAAATTCATTGTTTT  
TTCTTCATAGATGAGGATTCAAATGGTGCAATAGATCATGAAGAACTGAAAAGATGTTTCCTTAACTGGAG  
ATTTCTTTTTAGAGGAGGAAATCAACGATCTTTTTGAGGCATGTGATATCAATGAGGATATGGGAATGAAG  
TTCAATGAGTTCATTGTACTTCTCTGCCTTGTCTATCTTCTCAAGGAGGATCCTGCTGCCCTTCAGGCCAAATC  
ACGGATGGGGATGCCAAATCTGGAGGCAACCTTTGAAACACTGGTTGATGCATTTGTGTTCTGGACAAGAA  
TAAGGATGGTTATGTGAGCAAGAGCGAGATGGTGCATGCAATAAATGAAACAACCTGCAGGGGAGCGTTCTT  
CTGGAAGAATAGCCATGAAAAGATTGAGGAGATGGATTGGGATAAAAATGGAATGGTGAACCTCAAGGA  
GTTTCTTTTTGCTTTCACCCGTTGGGTTGGGATTGACGATATTGAGGATGAAGAAGAAGAAGGTGAAGAGAA  
AGTTTGA

**>VaCML21v2(MN540599)**

ATGGGAGGCGTGGTGGGAAAAGGCGATTACCTAGAAAAGCCTGGGTACCAGAAACCAAGCTTGAGGCCA  
AAATGGTTGAAGCTATTCAGCGGAGGGCATCTGAAGGAAGCGCCATGAAATCGTTCAACAGTATAATCTTG  
AAGTTCCCAAAAATTGATGAGAGTTAAGGAACTGCAAAGCTATTTTTAGCAATTTGATGAGGATTCAAAT  
GGTGAATAGATCATGAAGAACTGAAAAGATGTTTCCTTAACTGGAGATTTCTTTTTAGAGGAGGAAATC  
AACGATCTTTTTGAGGCATGTGATATCAATGAGGATATGGGAATGAAGTTCAATGAGTTCATTGTACTTCTCT  
GCCTTGTCTATCTTCTCAAGGAGGATCCTGCTGCCCTTCAGGCCAAATCACGGATGGGGATGCCAAATCTGG  
AGGCAACCTTTGAAACACTGGTTCGATGCATTTGTGTTCTGGACAAGAATAAGGATGGTTATGTGAGCAAGA  
GCGAGATGGTGCATGCAATAAATGAAACAACCTGCAGGGGAGCGTTCTTCTGGAAGAATAGCCATGAAAAG  
ATTGAGGAGATGGATTGGGATAAAAATGGAATGGTGAACCTCAAGGAGTTTCTTTTTGCTTTCACCCGTTGG  
GTTGGGATTGACGATATTGAGGATGAAGAAGAAGAAGGTGAAGAGAAAGTTTGA

**>VaCML21v3(MW033207)**

ATGCTGTGTATCATCCTTCATGTTGTATTTGCTTCTTCCCTCTCTGACATGCCAGAGTTGAAATTCGTTGTTTT  
TTCTTTGTAGATGAGGATTCAAATGGTGCAATAGATCATGAAGAACTGAAAAGATGTTTCCTTAACTGGAG  
ATTTCTTTTTAGAGGAGGAAATCAACGATCTTTTTGAGGCATGTGATATCAATGAGGATATGGGAATGAAG

TTCAATGAGTTCATTGTA CTTCTCTGCCTTGCTATCTTCTCAAGGAGGATCCTGCTGCCCTTCAGGCCGTATC  
CAAAAAATCACGGATGGGGATGCCAAATCTGGAGGCAACCTTTGAAACACTGGTCGATGCATTTGTGTTCCCT  
GGACAAGAATAAGGATGGTTATGTGAGCAAGAGCGAGATGGTGCATGCAATAAATGAAACAACCTGCAGGG  
GAGCGTTCTTCTGGAAGAATAGCCATGAAAAGATTCGAGGAGATGGATTGGGATAAAAAATGGAATGGTGAA  
CTTCAAGGAGTTTCTTTTTGCTTTCACCCGTTGGGTTGGGATTGACGATATTGAGGATGAAGAAGAAGAAGGT  
GAAGAGAAAGTTTGA

>VaCML21v4(MW033208)

ATGCTGTGATCATCCTTCATGTTGTATTTGCTTCTTCCCTCTCTGACATGCCAGAGGTTGAAATTCGTTGTTTT  
TTCTTTGTAGATGAGGATTCAAATGGTGCAATAGATCATGAAGAAGTAAAAGATGTTTCCTTAAACTGGAG  
ATTTCTTTTTTTCAGAGGAGGAAATCAACGATCTTTTTGAGGCATGTGATATCAATGAGGATATGGGAATGAAG  
TTCAATGAGTTCATTGTA CTTCTCTGCCTTGCTATCTTCTCAAGGAGGATCCTGCTGCCCTTCAGGCCAAATC  
ACGGATGGGGATGCCAAATCTGGAGGCAACCTTTGAAACACTGGTCGATGCATTTGTGTTCCCTGGACAAGAA  
TAAGGATGGTTATGTGAGCAAGAGCGAGATGGTGCATGCAATAAATGAAACAACCTGCAGGGGAGCGTTCTT  
CTGGAAGAATAGCCATGAAAAGATTCGAGGAGATGGATTGGGATAAAAAATGGAATGGTGAACCTTCAAGGA  
GTTTCTTTTTGCTTTCACCCGTTGGGTTGGGATTGACGATATTGAGGATGAAGAAGAAGAAGGTGAAGAGAA  
AGTTTGA
